# Supplementary material for: Simulation and Experimental Study on Drying Process of the Household Gas Clothes Dryer
Source: Hindawi journal article supplement (doi:10.1155/2019/1732197), 2019-01-01
Supplement: f1 [file 1732197.f1.zip]

Archive with 4 entries (4 files):
- 1732197.f1/1.5kg-60%-2017.9.30.xls
- 1732197.f1/3.5kg-60%-2017.9.30.xls
- 1732197.f1/6.0kg-60%-2017.9.30.xls
- 1732197.f1/Experiment VS Simulation Data.xlsx
