# Supplementary material for: Simulation and Experimental Study on Drying Process of the Household Gas Clothes Dryer
Source: Hindawi journal article supplement (doi:10.1155/2019/1732197), 2019-01-01
Supplement: f1 [file 1732197.f1.zip › 1732197.f1/1.5kg-60%-2017.9.30.xls]

## Sheet: Sheet0
GSP-6 数据报告
文件创建于:17/09/30 16:58:22
设备信息
记录间隔	0H 0M 10S	延时启动	0.0	启动时间	17/09/30 16:27:41
总空间	16000	按键停止	允许	预计停止时间	17/10/02 12:54:11
温度单位	°C	报警音设置	禁止	实际停止时间	17/09/30 16:50:01
按键音设置	禁止	记录模式	记满停止	GSP	禁止
行程描述
编号	
用户信息	GSP-6 temperature & humidity Data Logger
统计信息
上限	90.0°C	上限	100.0%RH	已记录次数	135
下限	0.0°C	下限	0.0%RH	起始时间	17/09/30 16:27:41
最大值	61.3°C	最大值	76.8%RH	结束时间	17/09/30 16:50:01
最小值	23.5°C	最小值	20.2%RH
平均值	53.3°C	平均值	40.2%RH
序号	时间	温度°C	湿度RH
1	17/09/30 16:27:41	23.5	71.1
2	17/09/30 16:27:51	24.7	71.6
3	17/09/30 16:28:01	27.5	74.9
4	17/09/30 16:28:11	30.5	76.8
5	17/09/30 16:28:21	32.4	76
6	17/09/30 16:28:31	34.3	74.4
7	17/09/30 16:28:41	36.5	71.9
8	17/09/30 16:28:51	38.3	68.5
9	17/09/30 16:29:01	39.5	66.6
10	17/09/30 16:29:11	40.4	65.2
11	17/09/30 16:29:21	41.9	64.3
12	17/09/30 16:29:31	42.8	62.3
13	17/09/30 16:29:41	44	60.3
14	17/09/30 16:29:51	45	58.8
15	17/09/30 16:30:01	45.7	57.3
16	17/09/30 16:30:11	46.5	55.8
17	17/09/30 16:30:21	47	54.9
18	17/09/30 16:30:31	47.6	53.5
19	17/09/30 16:30:41	48	52.5
20	17/09/30 16:30:51	48.4	51.9
21	17/09/30 16:31:01	49	50.6
22	17/09/30 16:31:11	49.8	49
23	17/09/30 16:31:21	50.5	47.5
24	17/09/30 16:31:31	51.2	46.2
25	17/09/30 16:31:41	51.3	45.7
26	17/09/30 16:31:51	52.1	44.2
27	17/09/30 16:32:01	52.4	43.6
28	17/09/30 16:32:11	52.2	44.1
29	17/09/30 16:32:21	52.8	42.6
30	17/09/30 16:32:31	52.8	42.6
31	17/09/30 16:32:41	53.1	42.3
32	17/09/30 16:32:51	52.9	42.3
33	17/09/30 16:33:01	52.6	42.8
34	17/09/30 16:33:11	52.2	43.3
35	17/09/30 16:33:21	52.4	43.3
36	17/09/30 16:33:31	52.4	43.1
37	17/09/30 16:33:41	52.6	42.3
38	17/09/30 16:33:51	52.6	42.3
39	17/09/30 16:34:01	53.4	40.8
40	17/09/30 16:34:11	53.9	40.3
41	17/09/30 16:34:21	53.5	40.7
42	17/09/30 16:34:31	54	39.4
43	17/09/30 16:34:41	55.1	37.4
44	17/09/30 16:34:51	55.9	36.8
45	17/09/30 16:35:01	56	36.3
46	17/09/30 16:35:11	55.7	36.8
47	17/09/30 16:35:21	55.3	37.8
48	17/09/30 16:35:31	55.6	37.3
49	17/09/30 16:35:41	55.6	36.9
50	17/09/30 16:35:51	55.4	37.4
51	17/09/30 16:36:01	55.3	38.3
52	17/09/30 16:36:11	55	38.4
53	17/09/30 16:36:21	54.8	38.3
54	17/09/30 16:36:31	55.3	37.9
55	17/09/30 16:36:41	55.7	36.8
56	17/09/30 16:36:51	55.9	36.4
57	17/09/30 16:37:01	56.2	35.8
58	17/09/30 16:37:11	56	35.9
59	17/09/30 16:37:21	57.1	34.3
60	17/09/30 16:37:31	57	34.3
61	17/09/30 16:37:41	56.6	35
62	17/09/30 16:37:51	56.3	35.3
63	17/09/30 16:38:01	55.7	36.4
64	17/09/30 16:38:11	55.6	36.3
65	17/09/30 16:38:21	55.4	36.9
66	17/09/30 16:38:31	56	35.8
67	17/09/30 16:38:41	55.7	36.8
68	17/09/30 16:38:51	55.4	36.9
69	17/09/30 16:39:01	55.5	36.8
70	17/09/30 16:39:11	55.5	36.9
71	17/09/30 16:39:21	55.1	37.3
72	17/09/30 16:39:31	54.8	37.9
73	17/09/30 16:39:41	54.8	38.3
74	17/09/30 16:39:51	54.2	38.7
75	17/09/30 16:40:01	54.4	38.7
76	17/09/30 16:40:11	54.5	38.4
77	17/09/30 16:40:21	54.4	38.7
78	17/09/30 16:40:31	54.2	38.9
79	17/09/30 16:40:41	53.8	39.4
80	17/09/30 16:40:51	54.1	39.2
81	17/09/30 16:41:01	54.7	37.4
82	17/09/30 16:41:11	54.8	37.9
83	17/09/30 16:41:21	54.2	39.2
84	17/09/30 16:41:31	54.2	38.9
85	17/09/30 16:41:41	54.1	38.7
86	17/09/30 16:41:51	54.4	38.3
87	17/09/30 16:42:01	54.3	38.7
88	17/09/30 16:42:11	53.9	39.4
89	17/09/30 16:42:21	53.9	39.2
90	17/09/30 16:42:31	54.4	38.4
91	17/09/30 16:42:41	55.2	36.9
92	17/09/30 16:42:51	55.1	37.3
93	17/09/30 16:43:01	55	37.4
94	17/09/30 16:43:11	55.6	36.3
95	17/09/30 16:43:21	56.3	35.3
96	17/09/30 16:43:31	56.2	35.9
97	17/09/30 16:43:41	56.2	35.8
98	17/09/30 16:43:51	57	34.5
99	17/09/30 16:44:01	56.8	34.3
100	17/09/30 16:44:11	56.6	35.3
101	17/09/30 16:44:21	56.4	35.4
102	17/09/30 16:44:31	55.9	35.8
103	17/09/30 16:44:41	56	35.3
104	17/09/30 16:44:51	56.2	35.4
105	17/09/30 16:45:01	56	35.4
106	17/09/30 16:45:11	56.3	35.3
107	17/09/30 16:45:21	56.4	35.4
108	17/09/30 16:45:31	56	35.3
109	17/09/30 16:45:41	56.8	33.9
110	17/09/30 16:45:51	57.7	32.4
111	17/09/30 16:46:01	57.7	32.4
112	17/09/30 16:46:11	57.8	32.5
113	17/09/30 16:46:21	58	32.4
114	17/09/30 16:46:31	58.2	31.9
115	17/09/30 16:46:41	58	31.1
116	17/09/30 16:46:51	58.9	30.4
117	17/09/30 16:47:01	58.9	30.6
118	17/09/30 16:47:11	59	30.4
119	17/09/30 16:47:21	59.3	29.1
120	17/09/30 16:47:31	59.4	28.5
121	17/09/30 16:47:41	59.7	28
122	17/09/30 16:47:51	60	27
123	17/09/30 16:48:01	60	26.5
124	17/09/30 16:48:11	60.4	26
125	17/09/30 16:48:21	60.7	25.2
126	17/09/30 16:48:31	60.6	25.2
127	17/09/30 16:48:41	60.6	25.2
128	17/09/30 16:48:51	60.4	25.6
129	17/09/30 16:49:01	60.9	24.6
130	17/09/30 16:49:11	61.3	24.2
131	17/09/30 16:49:21	61.3	23.6
132	17/09/30 16:49:31	60.9	22.6
133	17/09/30 16:49:41	61.1	22.6
134	17/09/30 16:49:51	61.1	22.1
135	17/09/30 16:50:01	60.9	20.2
