# Supplementary material for: Simulation and Experimental Study on Drying Process of the Household Gas Clothes Dryer
Source: Hindawi journal article supplement (doi:10.1155/2019/1732197), 2019-01-01
Supplement: f1 [file 1732197.f1.zip › 1732197.f1/3.5kg-60%-2017.9.30.xls]

## Sheet: Sheet0
GSP-6 数据报告
文件创建于:17/09/30 16:11:43
设备信息
记录间隔	0H 0M 10S	延时启动	0.0	启动时间	17/09/30 15:25:05
总空间	16000	按键停止	允许	预计停止时间	17/10/02 11:51:35
温度单位	°C	报警音设置	禁止	实际停止时间	17/09/30 16:07:25
按键音设置	禁止	记录模式	记满停止	GSP	禁止
行程描述
编号	
用户信息	GSP-6 temperature & humidity Data Logger
统计信息
上限	90.0°C	上限	100.0%RH	已记录次数	255
下限	0.0°C	下限	0.0%RH	起始时间	17/09/30 15:25:05
最大值	56.2°C	最大值	89.0%RH	结束时间	17/09/30 16:07:25
最小值	23.4°C	最小值	27.1%RH
平均值	46.2°C	平均值	59.4%RH
序号	时间	温度°C	湿度RH
1	17/09/30 15:25:05	23.4	80.9
2	17/09/30 15:25:15	24.9	84.6
3	17/09/30 15:25:25	26.2	87.1
4	17/09/30 15:25:35	27.3	88.1
5	17/09/30 15:25:45	28.9	89
6	17/09/30 15:25:55	30.3	88.5
7	17/09/30 15:26:05	31.2	87.1
8	17/09/30 15:26:15	32	86.6
9	17/09/30 15:26:25	32.8	86.1
10	17/09/30 15:26:35	33.4	85.7
11	17/09/30 15:26:45	34.3	85.3
12	17/09/30 15:26:55	35.1	84.3
13	17/09/30 15:27:05	35.9	83.3
14	17/09/30 15:27:15	36	83.3
15	17/09/30 15:27:25	36.5	83.8
16	17/09/30 15:27:35	37.5	82.8
17	17/09/30 15:27:45	38	81.7
18	17/09/30 15:27:55	38.7	80.7
19	17/09/30 15:28:05	39	79.3
20	17/09/30 15:28:15	39.5	78.3
21	17/09/30 15:28:25	39.7	78.8
22	17/09/30 15:28:35	39.7	79.3
23	17/09/30 15:28:45	40.1	78.4
24	17/09/30 15:28:55	40.5	78.8
25	17/09/30 15:29:05	41	77.4
26	17/09/30 15:29:15	41.4	76
27	17/09/30 15:29:25	41.9	74
28	17/09/30 15:29:35	42.3	72.6
29	17/09/30 15:29:45	42.7	71.6
30	17/09/30 15:29:55	43.3	70.5
31	17/09/30 15:30:05	43.3	70.5
32	17/09/30 15:30:15	42.7	71.6
33	17/09/30 15:30:25	42.7	71.1
34	17/09/30 15:30:35	43.1	70.6
35	17/09/30 15:30:45	43.5	70
36	17/09/30 15:30:55	43.8	69.5
37	17/09/30 15:31:05	43.5	70.1
38	17/09/30 15:31:15	43.8	69.5
39	17/09/30 15:31:25	43.8	69
40	17/09/30 15:31:35	43.5	68.6
41	17/09/30 15:31:45	43.5	69.1
42	17/09/30 15:31:55	43.4	69.6
43	17/09/30 15:32:05	43.6	69.1
44	17/09/30 15:32:15	43.8	69.1
45	17/09/30 15:32:25	43.4	70
46	17/09/30 15:32:35	43.7	69.5
47	17/09/30 15:32:45	43.7	69.5
48	17/09/30 15:32:55	43.3	69.5
49	17/09/30 15:33:05	43.1	70.5
50	17/09/30 15:33:15	43.1	71
51	17/09/30 15:33:25	43.4	70.6
52	17/09/30 15:33:35	43.5	70.6
53	17/09/30 15:33:45	43.8	69.5
54	17/09/30 15:33:55	43.7	68.6
55	17/09/30 15:34:05	43.6	70.5
56	17/09/30 15:34:15	43.6	70
57	17/09/30 15:34:25	43.4	70.6
58	17/09/30 15:34:35	43.1	71.1
59	17/09/30 15:34:45	43.3	71
60	17/09/30 15:34:55	43.5	70.1
61	17/09/30 15:35:05	43.8	69.5
62	17/09/30 15:35:15	43.9	69.1
63	17/09/30 15:35:25	43.8	69.1
64	17/09/30 15:35:35	43.8	69.5
65	17/09/30 15:35:45	44.1	68.5
66	17/09/30 15:35:55	44.2	68.2
67	17/09/30 15:36:05	44.4	67.7
68	17/09/30 15:36:15	44.4	67.2
69	17/09/30 15:36:25	44.5	67.6
70	17/09/30 15:36:35	44.8	66.7
71	17/09/30 15:36:45	44.7	67.2
72	17/09/30 15:36:55	44.6	67.2
73	17/09/30 15:37:05	44.3	67.1
74	17/09/30 15:37:15	44.2	67.2
75	17/09/30 15:37:25	44.2	68.2
76	17/09/30 15:37:35	44.1	68.2
77	17/09/30 15:37:45	44	68.5
78	17/09/30 15:37:55	44.4	67.7
79	17/09/30 15:38:05	44.7	66.7
80	17/09/30 15:38:15	44.8	66.1
81	17/09/30 15:38:25	44.7	66.6
82	17/09/30 15:38:35	44.7	66.7
83	17/09/30 15:38:45	44.4	67.1
84	17/09/30 15:38:55	44.3	67.6
85	17/09/30 15:39:05	44.3	67.6
86	17/09/30 15:39:15	44.4	66.7
87	17/09/30 15:39:25	44.8	66.6
88	17/09/30 15:39:35	44.6	66.7
89	17/09/30 15:39:45	44.3	67.2
90	17/09/30 15:39:55	44.1	68.2
91	17/09/30 15:40:05	44	68
92	17/09/30 15:40:15	44.1	67.2
93	17/09/30 15:40:25	44.4	66.6
94	17/09/30 15:40:35	44.9	66.1
95	17/09/30 15:40:45	45.4	65.1
96	17/09/30 15:40:55	45	65.1
97	17/09/30 15:41:05	44.7	65.7
98	17/09/30 15:41:15	44.9	65.7
99	17/09/30 15:41:25	45.1	64.7
100	17/09/30 15:41:35	45.3	64.3
101	17/09/30 15:41:45	45.3	64.1
102	17/09/30 15:41:55	44.9	65.1
103	17/09/30 15:42:05	44.7	65.7
104	17/09/30 15:42:15	44.8	65.6
105	17/09/30 15:42:25	44.8	65.7
106	17/09/30 15:42:35	44.8	66.1
107	17/09/30 15:42:45	44.7	65.7
108	17/09/30 15:42:55	44.4	66.7
109	17/09/30 15:43:05	44.3	67.1
110	17/09/30 15:43:15	44.2	67.1
111	17/09/30 15:43:25	44.2	67.1
112	17/09/30 15:43:35	44.6	66.1
113	17/09/30 15:43:45	44.9	65.6
114	17/09/30 15:43:55	45	65.2
115	17/09/30 15:44:05	44.8	65.6
116	17/09/30 15:44:15	45.1	65.2
117	17/09/30 15:44:25	45.4	64.3
118	17/09/30 15:44:35	45.3	64.1
119	17/09/30 15:44:45	44.9	64.1
120	17/09/30 15:44:55	44.4	65.7
121	17/09/30 15:45:05	44.3	67.2
122	17/09/30 15:45:15	44.3	67.2
123	17/09/30 15:45:25	44.6	66.7
124	17/09/30 15:45:35	44.4	66.1
125	17/09/30 15:45:45	44.4	66.7
126	17/09/30 15:45:55	44.9	66.2
127	17/09/30 15:46:05	45	65.7
128	17/09/30 15:46:15	44.9	65.7
129	17/09/30 15:46:25	44.7	66.2
130	17/09/30 15:46:35	44.6	66.2
131	17/09/30 15:46:45	44.6	66.2
132	17/09/30 15:46:55	44.3	66.7
133	17/09/30 15:47:05	44.1	67.2
134	17/09/30 15:47:15	44.2	67.1
135	17/09/30 15:47:25	44.3	66.6
136	17/09/30 15:47:35	44.7	65.6
137	17/09/30 15:47:45	44.7	65.6
138	17/09/30 15:47:55	45	64.7
139	17/09/30 15:48:05	44.8	65.6
140	17/09/30 15:48:15	44.5	65.7
141	17/09/30 15:48:25	44.6	66.2
142	17/09/30 15:48:35	44.6	66.1
143	17/09/30 15:48:45	44.6	65.7
144	17/09/30 15:48:55	44.8	65.1
145	17/09/30 15:49:05	45	65.1
146	17/09/30 15:49:15	45.3	64.7
147	17/09/30 15:49:25	45	65.2
148	17/09/30 15:49:35	44.7	65.6
149	17/09/30 15:49:45	44.6	66.1
150	17/09/30 15:49:55	45	65.2
151	17/09/30 15:50:05	45.3	64.7
152	17/09/30 15:50:15	45.5	64.1
153	17/09/30 15:50:25	46.1	61.8
154	17/09/30 15:50:35	46.7	59.7
155	17/09/30 15:50:45	47.2	58.4
156	17/09/30 15:50:55	47.4	57.8
157	17/09/30 15:51:05	47.3	58.4
158	17/09/30 15:51:15	46.9	59.9
159	17/09/30 15:51:25	46.7	60.3
160	17/09/30 15:51:35	46.4	61.3
161	17/09/30 15:51:45	46.4	61.2
162	17/09/30 15:51:55	46.7	59.4
163	17/09/30 15:52:05	46.6	59.7
164	17/09/30 15:52:15	46.7	58.8
165	17/09/30 15:52:25	47.5	56.9
166	17/09/30 15:52:35	47.9	56.3
167	17/09/30 15:52:45	47.8	55.3
168	17/09/30 15:52:55	48	56
169	17/09/30 15:53:05	48	55.5
170	17/09/30 15:53:15	48.2	55
171	17/09/30 15:53:25	48.6	54.4
172	17/09/30 15:53:35	48.9	53.5
173	17/09/30 15:53:45	49.4	52.4
174	17/09/30 15:53:55	49.4	52
175	17/09/30 15:54:05	50	51.1
176	17/09/30 15:54:15	50.3	50.5
177	17/09/30 15:54:25	50.2	50.1
178	17/09/30 15:54:35	50.6	49
179	17/09/30 15:54:45	50.6	48.6
180	17/09/30 15:54:55	50.5	49
181	17/09/30 15:55:05	51	48
182	17/09/30 15:55:15	50.9	47.7
183	17/09/30 15:55:25	50.8	47.5
184	17/09/30 15:55:35	50.6	48
185	17/09/30 15:55:45	50.6	47.5
186	17/09/30 15:55:55	50.9	46.2
187	17/09/30 15:56:05	51.3	45.1
188	17/09/30 15:56:15	51.3	44.6
189	17/09/30 15:56:25	51.4	44.1
190	17/09/30 15:56:35	51.6	43.3
191	17/09/30 15:56:45	51.9	42.8
192	17/09/30 15:56:55	51.9	42.8
193	17/09/30 15:57:05	51.7	43.6
194	17/09/30 15:57:15	51.1	44.7
195	17/09/30 15:57:25	50.9	45.1
196	17/09/30 15:57:35	50.8	44.2
197	17/09/30 15:57:45	50.7	44.1
198	17/09/30 15:57:55	51	42.8
199	17/09/30 15:58:05	51.6	41.7
200	17/09/30 15:58:15	51.5	42.3
201	17/09/30 15:58:25	51	43.7
202	17/09/30 15:58:35	50.6	45.2
203	17/09/30 15:58:45	50.2	45.2
204	17/09/30 15:58:55	50.2	45.1
205	17/09/30 15:59:05	50.5	44.2
206	17/09/30 15:59:15	50.9	43.7
207	17/09/30 15:59:25	51.1	43.1
208	17/09/30 15:59:35	51.3	43.3
209	17/09/30 15:59:45	51.1	43.7
210	17/09/30 15:59:55	51.1	44.1
211	17/09/30 16:00:05	50.7	44.2
212	17/09/30 16:00:15	50.5	44.1
213	17/09/30 16:00:25	50.2	44.2
214	17/09/30 16:00:35	50.2	43.7
215	17/09/30 16:00:45	50.2	43.6
216	17/09/30 16:00:55	50.1	43.7
217	17/09/30 16:01:05	50.3	43.3
218	17/09/30 16:01:15	50.6	43.1
219	17/09/30 16:01:25	50.5	42.8
220	17/09/30 16:01:35	50.6	42.3
221	17/09/30 16:01:45	50.9	42.2
222	17/09/30 16:01:55	51.4	41.7
223	17/09/30 16:02:05	51.9	40.7
224	17/09/30 16:02:15	52.4	40.2
225	17/09/30 16:02:25	52.8	39.4
226	17/09/30 16:02:35	53.1	39.2
227	17/09/30 16:02:45	53.1	38.7
228	17/09/30 16:02:55	53.2	38.3
229	17/09/30 16:03:05	53.7	37.4
230	17/09/30 16:03:15	54	36.8
231	17/09/30 16:03:25	54.5	35.9
232	17/09/30 16:03:35	54.7	35.9
233	17/09/30 16:03:45	54.8	35.8
234	17/09/30 16:03:55	55.1	35.3
235	17/09/30 16:04:05	55.4	34.5
236	17/09/30 16:04:15	56	33.9
237	17/09/30 16:04:25	56.2	33.4
238	17/09/30 16:04:35	56.2	32.9
239	17/09/30 16:04:45	55.7	32.5
240	17/09/30 16:04:55	55.6	31.9
241	17/09/30 16:05:05	55.8	31.1
242	17/09/30 16:05:15	56.2	30.4
243	17/09/30 16:05:25	56.1	30.1
244	17/09/30 16:05:35	56.2	30
245	17/09/30 16:05:45	56.2	30
246	17/09/30 16:05:55	56.2	29.6
247	17/09/30 16:06:05	56.1	29.1
248	17/09/30 16:06:15	56	29
249	17/09/30 16:06:25	56	28.6
250	17/09/30 16:06:35	55.7	28.5
251	17/09/30 16:06:45	55.7	28
252	17/09/30 16:06:55	55.7	27.6
253	17/09/30 16:07:05	56	27.5
254	17/09/30 16:07:15	55.9	27.5
255	17/09/30 16:07:25	55.4	27.1
