# Supplementary material for: Simulation and Experimental Study on Drying Process of the Household Gas Clothes Dryer
Source: Hindawi journal article supplement (doi:10.1155/2019/1732197), 2019-01-01
Supplement: f1 [file 1732197.f1.zip › 1732197.f1/6.0kg-60%-2017.9.30.xls]

## Sheet: Sheet0
GSP-6 数据报告
文件创建于:17/09/30 18:33:14
设备信息
记录间隔	0H 0M 10S	延时启动	0.0	启动时间	17/09/30 17:09:35
总空间	16000	按键停止	允许	预计停止时间	17/10/02 13:36:05
温度单位	°C	报警音设置	禁止	实际停止时间	17/09/30 18:23:45
按键音设置	禁止	记录模式	记满停止	GSP	禁止
行程描述
编号	
用户信息	GSP-6 temperature & humidity Data Logger
统计信息
上限	90.0°C	上限	100.0%RH	已记录次数	446
下限	0.0°C	下限	0.0%RH	起始时间	17/09/30 17:09:35
最大值	53.8°C	最大值	88.5%RH	结束时间	17/09/30 18:23:45
最小值	27.0°C	最小值	21.3%RH
平均值	44.0°C	平均值	63.5%RH
序号	时间	温度°C	湿度RH
1	17/09/30 17:09:35	27.3	80.4
2	17/09/30 17:09:45	27.3	79.8
3	17/09/30 17:09:55	27.1	78.8
4	17/09/30 17:10:05	27.2	78.4
5	17/09/30 17:10:15	27.2	78.3
6	17/09/30 17:10:25	27	78.8
7	17/09/30 17:10:35	27.4	80.7
8	17/09/30 17:10:45	27.9	82.3
9	17/09/30 17:10:55	28.5	83.8
10	17/09/30 17:11:05	29.2	85.6
11	17/09/30 17:11:15	30	87.1
12	17/09/30 17:11:25	30.8	87.7
13	17/09/30 17:11:35	31.5	87.7
14	17/09/30 17:11:45	32.5	88.5
15	17/09/30 17:11:55	33.1	88.5
16	17/09/30 17:12:05	34	88.2
17	17/09/30 17:12:15	34.5	87.6
18	17/09/30 17:12:25	35.1	87.1
19	17/09/30 17:12:35	35.7	86.7
20	17/09/30 17:12:45	36.3	86.2
21	17/09/30 17:12:55	37.1	85.6
22	17/09/30 17:13:05	37.5	84.8
23	17/09/30 17:13:15	38	84.2
24	17/09/30 17:13:25	38.4	82.8
25	17/09/30 17:13:35	38.5	81.8
26	17/09/30 17:13:45	38.6	82.3
27	17/09/30 17:13:55	38.8	81.8
28	17/09/30 17:14:05	39.3	81.2
29	17/09/30 17:14:15	40.1	80.2
30	17/09/30 17:14:25	41.3	78.4
31	17/09/30 17:14:35	41.5	77.4
32	17/09/30 17:14:45	41.8	76.5
33	17/09/30 17:14:55	42	75
34	17/09/30 17:15:05	42.4	73.9
35	17/09/30 17:15:15	43.1	73.4
36	17/09/30 17:15:25	42.9	73
37	17/09/30 17:15:35	42.7	72.9
38	17/09/30 17:15:45	42.4	73.4
39	17/09/30 17:15:55	42.1	73.5
40	17/09/30 17:16:05	42	71.5
41	17/09/30 17:16:15	42	73
42	17/09/30 17:16:25	41.8	74.4
43	17/09/30 17:16:35	42	74.4
44	17/09/30 17:16:45	42.5	73.9
45	17/09/30 17:16:55	42.4	73.5
46	17/09/30 17:17:05	42.1	73.4
47	17/09/30 17:17:15	41.6	73
48	17/09/30 17:17:25	41.3	74.5
49	17/09/30 17:17:35	41.2	75.5
50	17/09/30 17:17:45	41.2	76.5
51	17/09/30 17:17:55	41.1	76.8
52	17/09/30 17:18:05	41.1	77
53	17/09/30 17:18:15	41.2	77.3
54	17/09/30 17:18:25	41.6	76.5
55	17/09/30 17:18:35	41.4	76
56	17/09/30 17:18:45	41.5	76.8
57	17/09/30 17:18:55	41.7	76.5
58	17/09/30 17:19:05	41.9	76
59	17/09/30 17:19:15	42	76
60	17/09/30 17:19:25	41.7	75.9
61	17/09/30 17:19:35	41.7	76
62	17/09/30 17:19:45	42	76.3
63	17/09/30 17:19:55	42	76
64	17/09/30 17:20:05	42	76.5
65	17/09/30 17:20:15	41.7	76.8
66	17/09/30 17:20:25	41.6	76.5
67	17/09/30 17:20:35	41.8	76
68	17/09/30 17:20:45	41.9	76.3
69	17/09/30 17:20:55	42	76.3
70	17/09/30 17:21:05	42.3	75.5
71	17/09/30 17:21:15	42.4	75.4
72	17/09/30 17:21:25	42.4	75.4
73	17/09/30 17:21:35	42.5	74.9
74	17/09/30 17:21:45	42.6	74.9
75	17/09/30 17:21:55	42.5	75
76	17/09/30 17:22:05	42.5	74.9
77	17/09/30 17:22:15	42.4	74.5
78	17/09/30 17:22:25	42.4	75
79	17/09/30 17:22:35	42.4	76
80	17/09/30 17:22:45	42.6	75.5
81	17/09/30 17:22:55	42.6	75
82	17/09/30 17:23:05	42.5	74.9
83	17/09/30 17:23:15	42.7	74.5
84	17/09/30 17:23:25	42.8	74.5
85	17/09/30 17:23:35	43.1	74
86	17/09/30 17:23:45	43.4	73.5
87	17/09/30 17:23:55	43.4	73
88	17/09/30 17:24:05	43.6	72.4
89	17/09/30 17:24:15	43.9	71.5
90	17/09/30 17:24:25	43.7	72.1
91	17/09/30 17:24:35	43.3	72.9
92	17/09/30 17:24:45	43.2	72.6
93	17/09/30 17:24:55	43.6	72.1
94	17/09/30 17:25:05	43.9	71.6
95	17/09/30 17:25:15	44	71.1
96	17/09/30 17:25:25	43.8	71
97	17/09/30 17:25:35	43.4	71
98	17/09/30 17:25:45	43.3	72.1
99	17/09/30 17:25:55	43.3	73.5
100	17/09/30 17:26:05	43.2	74
101	17/09/30 17:26:15	43	74.5
102	17/09/30 17:26:25	42.9	74.4
103	17/09/30 17:26:35	42.8	73.5
104	17/09/30 17:26:45	42.7	73.5
105	17/09/30 17:26:55	42.9	74
106	17/09/30 17:27:05	42.8	74.5
107	17/09/30 17:27:15	42.6	74.9
108	17/09/30 17:27:25	42.4	75
109	17/09/30 17:27:35	42.4	75
110	17/09/30 17:27:45	42.4	75.4
111	17/09/30 17:27:55	42.5	75
112	17/09/30 17:28:05	42.6	74.9
113	17/09/30 17:28:15	42.7	74.5
114	17/09/30 17:28:25	42.9	73.9
115	17/09/30 17:28:35	43	73.4
116	17/09/30 17:28:45	42.9	74
117	17/09/30 17:28:55	42.7	74.4
118	17/09/30 17:29:05	42.5	74.4
119	17/09/30 17:29:15	42.5	73.5
120	17/09/30 17:29:25	43	73.5
121	17/09/30 17:29:35	43	74
122	17/09/30 17:29:45	43.2	74
123	17/09/30 17:29:55	43.3	73.5
124	17/09/30 17:30:05	43.3	72.9
125	17/09/30 17:30:15	43.1	73
126	17/09/30 17:30:25	42.9	74
127	17/09/30 17:30:35	42.6	74.4
128	17/09/30 17:30:45	43.3	73
129	17/09/30 17:30:55	43.8	72.4
130	17/09/30 17:31:05	43.8	72.6
131	17/09/30 17:31:15	43.6	72.4
132	17/09/30 17:31:25	43.7	72.4
133	17/09/30 17:31:35	43.9	71.9
134	17/09/30 17:31:45	43.9	71.9
135	17/09/30 17:31:55	43.6	72.1
136	17/09/30 17:32:05	43.7	71.9
137	17/09/30 17:32:15	43.6	71.9
138	17/09/30 17:32:25	43.8	72.1
139	17/09/30 17:32:35	44	71.5
140	17/09/30 17:32:45	44.1	71
141	17/09/30 17:32:55	43.9	71.1
142	17/09/30 17:33:05	43.9	71.5
143	17/09/30 17:33:15	43.7	71.6
144	17/09/30 17:33:25	43.6	71.9
145	17/09/30 17:33:35	43.4	71.9
146	17/09/30 17:33:45	43.4	71.9
147	17/09/30 17:33:55	43.2	72.4
148	17/09/30 17:34:05	43.2	72.6
149	17/09/30 17:34:15	43.2	72.4
150	17/09/30 17:34:25	43.3	72.1
151	17/09/30 17:34:35	43.5	71.6
152	17/09/30 17:34:45	43.6	71.1
153	17/09/30 17:34:55	43.4	72.1
154	17/09/30 17:35:05	43.3	72.6
155	17/09/30 17:35:15	43.3	72.4
156	17/09/30 17:35:25	43.2	72.4
157	17/09/30 17:35:35	43.2	72.9
158	17/09/30 17:35:45	43	73
159	17/09/30 17:35:55	42.7	73.4
160	17/09/30 17:36:05	42.7	73.9
161	17/09/30 17:36:15	42.7	73.9
162	17/09/30 17:36:25	42.5	74
163	17/09/30 17:36:35	42.3	74.4
164	17/09/30 17:36:45	42.4	74.5
165	17/09/30 17:36:55	42.5	75
166	17/09/30 17:37:05	42.6	75
167	17/09/30 17:37:15	42.6	74
168	17/09/30 17:37:25	42.6	73.9
169	17/09/30 17:37:35	42.4	74.4
170	17/09/30 17:37:45	42.5	74.9
171	17/09/30 17:37:55	42.6	75
172	17/09/30 17:38:05	42.9	74.9
173	17/09/30 17:38:15	43	73.9
174	17/09/30 17:38:25	43	73.5
175	17/09/30 17:38:35	42.9	73.5
176	17/09/30 17:38:45	42.9	73.5
177	17/09/30 17:38:55	43	73.5
178	17/09/30 17:39:05	43.1	73.5
179	17/09/30 17:39:15	43	73.9
180	17/09/30 17:39:25	42.9	73.5
181	17/09/30 17:39:35	42.9	73.9
182	17/09/30 17:39:45	42.7	74
183	17/09/30 17:39:55	43.1	73.9
184	17/09/30 17:40:05	43.1	73.9
185	17/09/30 17:40:15	43.1	73.9
186	17/09/30 17:40:25	43.4	73
187	17/09/30 17:40:35	43.3	72.4
188	17/09/30 17:40:45	43.6	71.9
189	17/09/30 17:40:55	43.6	72.4
190	17/09/30 17:41:05	43.4	72.9
191	17/09/30 17:41:15	43.2	73
192	17/09/30 17:41:25	42.9	73.5
193	17/09/30 17:41:35	42.6	74
194	17/09/30 17:41:45	42.4	74.5
195	17/09/30 17:41:55	42.1	74.9
196	17/09/30 17:42:05	42	75.4
197	17/09/30 17:42:15	41.9	75.5
198	17/09/30 17:42:25	42	75.5
199	17/09/30 17:42:35	42.3	74.9
200	17/09/30 17:42:45	42.2	75
201	17/09/30 17:42:55	42	75.9
202	17/09/30 17:43:05	41.8	76.3
203	17/09/30 17:43:15	41.6	76.3
204	17/09/30 17:43:25	41.5	76.5
205	17/09/30 17:43:35	41.5	76.8
206	17/09/30 17:43:45	41.5	76.5
207	17/09/30 17:43:55	41.6	76.3
208	17/09/30 17:44:05	41.6	76.8
209	17/09/30 17:44:15	41.5	77
210	17/09/30 17:44:25	41.7	77.4
211	17/09/30 17:44:35	42.1	77.4
212	17/09/30 17:44:45	42.5	77
213	17/09/30 17:44:55	42.7	76.3
214	17/09/30 17:45:05	42.9	76
215	17/09/30 17:45:15	42.7	75.9
216	17/09/30 17:45:25	43	75.4
217	17/09/30 17:45:35	43.1	74.9
218	17/09/30 17:45:45	42.8	75
219	17/09/30 17:45:55	42.6	75
220	17/09/30 17:46:05	42.6	75
221	17/09/30 17:46:15	42.6	75
222	17/09/30 17:46:25	42.6	75.4
223	17/09/30 17:46:35	42.7	74.9
224	17/09/30 17:46:45	42.7	74.5
225	17/09/30 17:46:55	42.9	73.4
226	17/09/30 17:47:05	43	72.9
227	17/09/30 17:47:15	43.1	72.1
228	17/09/30 17:47:25	42.9	72.1
229	17/09/30 17:47:35	42.6	72.4
230	17/09/30 17:47:45	42.4	72.4
231	17/09/30 17:47:55	42.3	72.9
232	17/09/30 17:48:05	42.1	72.6
233	17/09/30 17:48:15	41.9	72.6
234	17/09/30 17:48:25	41.8	73
235	17/09/30 17:48:35	41.6	73.5
236	17/09/30 17:48:45	41.6	73.5
237	17/09/30 17:48:55	41.5	73.5
238	17/09/30 17:49:05	41.6	73
239	17/09/30 17:49:15	42.4	71.5
240	17/09/30 17:49:25	42.9	70
241	17/09/30 17:49:35	42.9	69.6
242	17/09/30 17:49:45	42.9	69.5
243	17/09/30 17:49:55	42.6	69.5
244	17/09/30 17:50:05	42.4	69.6
245	17/09/30 17:50:15	42.2	70
246	17/09/30 17:50:25	42.1	70
247	17/09/30 17:50:35	42	70.1
248	17/09/30 17:50:45	41.9	70.1
249	17/09/30 17:50:55	41.9	70.1
250	17/09/30 17:51:05	41.9	70.5
251	17/09/30 17:51:15	42.2	69.5
252	17/09/30 17:51:25	42.4	69.1
253	17/09/30 17:51:35	42.5	69.5
254	17/09/30 17:51:45	42.6	69.1
255	17/09/30 17:51:55	42.9	68.5
256	17/09/30 17:52:05	42.9	68.6
257	17/09/30 17:52:15	42.9	68.6
258	17/09/30 17:52:25	43	68.2
259	17/09/30 17:52:35	42.9	68.2
260	17/09/30 17:52:45	42.7	68.5
261	17/09/30 17:52:55	42.7	68.5
262	17/09/30 17:53:05	42.7	68.6
263	17/09/30 17:53:15	42.7	68.6
264	17/09/30 17:53:25	42.6	69.1
265	17/09/30 17:53:35	42.4	69.5
266	17/09/30 17:53:45	42.4	69.1
267	17/09/30 17:53:55	42.5	68.6
268	17/09/30 17:54:05	42.5	68.5
269	17/09/30 17:54:15	42.4	69
270	17/09/30 17:54:25	42.6	68.5
271	17/09/30 17:54:35	42.5	68.6
272	17/09/30 17:54:45	42.4	69.1
273	17/09/30 17:54:55	42.5	68.6
274	17/09/30 17:55:05	42.4	69
275	17/09/30 17:55:15	42.3	69
276	17/09/30 17:55:25	42.1	69.6
277	17/09/30 17:55:35	42.3	69.5
278	17/09/30 17:55:45	42.2	69.6
279	17/09/30 17:55:55	42.3	69.6
280	17/09/30 17:56:05	42.3	70
281	17/09/30 17:56:15	42.3	69.6
282	17/09/30 17:56:25	42.7	68.5
283	17/09/30 17:56:35	43.3	67.1
284	17/09/30 17:56:45	43.5	66.2
285	17/09/30 17:56:55	43.6	66.1
286	17/09/30 17:57:05	43.9	65.7
287	17/09/30 17:57:15	44.1	65.1
288	17/09/30 17:57:25	44.2	64.7
289	17/09/30 17:57:35	44.2	64.3
290	17/09/30 17:57:45	44.3	63.8
291	17/09/30 17:57:55	44.6	63.2
292	17/09/30 17:58:05	44.4	63.3
293	17/09/30 17:58:15	44.6	63.6
294	17/09/30 17:58:25	44.6	63.6
295	17/09/30 17:58:35	44.5	63.8
296	17/09/30 17:58:45	44.4	63.8
297	17/09/30 17:58:55	44.4	63.6
298	17/09/30 17:59:05	44.5	63.2
299	17/09/30 17:59:15	44.8	62.3
300	17/09/30 17:59:25	45.1	61.3
301	17/09/30 17:59:35	45.9	59.7
302	17/09/30 17:59:45	46.6	58.3
303	17/09/30 17:59:55	46.7	57.4
304	17/09/30 18:00:05	46.4	57.4
305	17/09/30 18:00:15	46.3	57.4
306	17/09/30 18:00:25	46.1	57.8
307	17/09/30 18:00:35	46	57.8
308	17/09/30 18:00:45	45.6	58.3
309	17/09/30 18:00:55	45.6	57.9
310	17/09/30 18:01:05	45.7	57.9
311	17/09/30 18:01:15	46.1	57.3
312	17/09/30 18:01:25	46.2	57.4
313	17/09/30 18:01:35	46.2	57.4
314	17/09/30 18:01:45	46.1	57.3
315	17/09/30 18:01:55	46.2	56.9
316	17/09/30 18:02:05	46.4	56.8
317	17/09/30 18:02:15	46.6	56
318	17/09/30 18:02:25	46.6	55.5
319	17/09/30 18:02:35	46.6	55.5
320	17/09/30 18:02:45	46.4	55.5
321	17/09/30 18:02:55	46.4	55.8
322	17/09/30 18:03:05	46.6	55.5
323	17/09/30 18:03:15	46.7	55
324	17/09/30 18:03:25	46.8	55
325	17/09/30 18:03:35	46.9	54.9
326	17/09/30 18:03:45	47	54.5
327	17/09/30 18:03:55	47	54.5
328	17/09/30 18:04:05	47.1	54.9
329	17/09/30 18:04:15	47.3	54.9
330	17/09/30 18:04:25	47.3	54.5
331	17/09/30 18:04:35	47.2	54.4
332	17/09/30 18:04:45	47	54.4
333	17/09/30 18:04:55	46.8	54.5
334	17/09/30 18:05:05	46.8	54.5
335	17/09/30 18:05:15	46.7	54.5
336	17/09/30 18:05:25	46.6	54
337	17/09/30 18:05:35	46.6	53.4
338	17/09/30 18:05:45	46.5	53
339	17/09/30 18:05:55	46.2	53
340	17/09/30 18:06:05	46.1	53.4
341	17/09/30 18:06:15	46	53.4
342	17/09/30 18:06:25	45.8	53
343	17/09/30 18:06:35	45.7	52.4
344	17/09/30 18:06:45	45.5	52.5
345	17/09/30 18:06:55	45.3	52.5
346	17/09/30 18:07:05	45.3	51.9
347	17/09/30 18:07:15	45.4	51.4
348	17/09/30 18:07:25	45.5	50.9
349	17/09/30 18:07:35	45.6	50.5
350	17/09/30 18:07:45	45.6	50.1
351	17/09/30 18:07:55	45.6	50
352	17/09/30 18:08:05	46	49.5
353	17/09/30 18:08:15	46.4	48.6
354	17/09/30 18:08:25	46.7	47.5
355	17/09/30 18:08:35	47.2	47.5
356	17/09/30 18:08:45	47.3	46.7
357	17/09/30 18:08:55	47.5	46.1
358	17/09/30 18:09:05	47.4	45.7
359	17/09/30 18:09:15	47.6	45.1
360	17/09/30 18:09:25	47.3	45.6
361	17/09/30 18:09:35	47	45.7
362	17/09/30 18:09:45	46.8	46.1
363	17/09/30 18:09:55	46.6	46.6
364	17/09/30 18:10:05	46.1	47
365	17/09/30 18:10:15	46	47
366	17/09/30 18:10:25	45.8	47
367	17/09/30 18:10:35	45.6	47
368	17/09/30 18:10:45	45.5	47.2
369	17/09/30 18:10:55	45.4	47.2
370	17/09/30 18:11:05	45.4	48
371	17/09/30 18:11:15	45.4	48.6
372	17/09/30 18:11:25	45.5	48.6
373	17/09/30 18:11:35	46.2	47.7
374	17/09/30 18:11:45	46.1	47
375	17/09/30 18:11:55	46.2	46.7
376	17/09/30 18:12:05	46.4	46.6
377	17/09/30 18:12:15	46.7	46.1
378	17/09/30 18:12:25	46.7	45.2
379	17/09/30 18:12:35	47	45.6
380	17/09/30 18:12:45	47.5	46.1
381	17/09/30 18:12:55	48.3	45.7
382	17/09/30 18:13:05	49.2	44.1
383	17/09/30 18:13:15	49.7	43.1
384	17/09/30 18:13:25	50.2	41.8
385	17/09/30 18:13:35	50.5	40.7
386	17/09/30 18:13:45	50.6	40.2
387	17/09/30 18:13:55	50.9	39.2
388	17/09/30 18:14:05	51	38.7
389	17/09/30 18:14:15	51	37.9
390	17/09/30 18:14:25	51	37.4
391	17/09/30 18:14:35	51	36.9
392	17/09/30 18:14:45	51	36.8
393	17/09/30 18:14:55	50.9	36.3
394	17/09/30 18:15:05	50.7	36.3
395	17/09/30 18:15:15	50.5	36.3
396	17/09/30 18:15:25	50.3	36.3
397	17/09/30 18:15:35	50.2	36.3
398	17/09/30 18:15:45	50	36.3
399	17/09/30 18:15:55	50	36.3
400	17/09/30 18:16:05	50.1	35.8
401	17/09/30 18:16:15	50.3	35.3
402	17/09/30 18:16:25	50.5	35
403	17/09/30 18:16:35	50.7	34.5
404	17/09/30 18:16:45	51	33.9
405	17/09/30 18:16:55	51.2	33.5
406	17/09/30 18:17:05	51.3	33.4
407	17/09/30 18:17:15	51.1	33.4
408	17/09/30 18:17:25	51	33.4
409	17/09/30 18:17:35	51.1	33.4
410	17/09/30 18:17:45	51.5	32.5
411	17/09/30 18:17:55	52.1	31.9
412	17/09/30 18:18:05	52.7	31.1
413	17/09/30 18:18:15	53	30.6
414	17/09/30 18:18:25	53.2	30.4
415	17/09/30 18:18:35	53.1	30.4
416	17/09/30 18:18:45	53	30.1
417	17/09/30 18:18:55	52.8	30.4
418	17/09/30 18:19:05	52.8	30.4
419	17/09/30 18:19:15	52.9	30.4
420	17/09/30 18:19:25	53	30.1
421	17/09/30 18:19:35	53.1	30.1
422	17/09/30 18:19:45	53.1	30
423	17/09/30 18:19:55	53.2	29.6
424	17/09/30 18:20:05	53.3	29.6
425	17/09/30 18:20:15	53.5	29.1
426	17/09/30 18:20:25	53.7	29
427	17/09/30 18:20:35	53.8	28.6
428	17/09/30 18:20:45	53.7	28.6
429	17/09/30 18:20:55	53.5	29
430	17/09/30 18:21:05	53.7	28.5
431	17/09/30 18:21:15	53.8	28.6
432	17/09/30 18:21:25	53.6	28.6
433	17/09/30 18:21:35	53.4	28.5
434	17/09/30 18:21:45	53.2	27.1
435	17/09/30 18:21:55	53	25.1
436	17/09/30 18:22:05	52.8	23.6
437	17/09/30 18:22:15	52.7	22.8
438	17/09/30 18:22:25	52.5	22.3
439	17/09/30 18:22:35	52.3	22.1
440	17/09/30 18:22:45	52.1	21.8
441	17/09/30 18:22:55	51.9	21.7
442	17/09/30 18:23:05	51.8	21.7
443	17/09/30 18:23:15	51.7	21.7
444	17/09/30 18:23:25	51.5	21.7
445	17/09/30 18:23:35	51.3	21.3
446	17/09/30 18:23:45	51.1	21.3
