# Supplementary material for: Simulation and Experimental Study on Drying Process of the Household Gas Clothes Dryer
Source: Hindawi journal article supplement (doi:10.1155/2019/1732197), 2019-01-01
Supplement: f1 [file 1732197.f1.zip › 1732197.f1/Experiment VS Simulation Data.xlsx]

## Sheet: 衣物类型的影响
100	31.5278
110	32.1943
120	32.7905		计算燃气干衣机不同类型的除湿速率和SMER
130	33.3235
140	33.7959		类型	尼龙	纯棉	毛纺
150	34.2142		燃气V0Nm3/s	0.000103161	0.000103161	0.000103161
160	34.5839		总用时time/s	2290	2494	2570
			总用时time/min	38.1667	41.5667	42.8333
170	34.9096		总用气量Vz/Nm3	0.236238	0.257283	0.265123
180	35.1968		干燥能耗E/kwh	2.29939	2.50422	2.58053
190	35.4512		极干质量kg	3.525	3.525	3.525
200	35.6727		初始质量kg	5.973	5.973	5.973
210	35.8656		最终质量kg	3.84	3.84	3.84
220	36.0335		除湿速率kg/h	3.35319	3.07891	2.98786
230	36.1796		SMERkwh/kg	1.07801	1.17404	1.20981
240	36.3067		能效	0.635201	0.583243	0.565996
250	36.4175
260	36.5135
270	36.5966
280	36.6686
290	36.7309
300	36.7847
310	36.8313
320	36.8716
330	36.9064
340	36.9365
350	36.9625
360	36.985
370	37.0044
380	37.0211
390	37.0356
400	37.0481
410	37.0589
420	37.0682
430	37.0763
440	37.0832
450	37.0892
460	37.0944
470	37.099
480	37.1029
490	37.1063
500	37.1092
510	37.1118
520	37.1141
530	37.1161
540	37.1178
550	37.1194
560	37.1208
570	37.122
580	37.1232
590	37.1242
600	37.1251
610	37.9252
620	37.9076
630	37.8926
640	37.8799
650	37.8692
660	37.8601
670	37.8524
680	37.846
690	37.8407
700	37.8362
710	37.8326
720	37.8296
730	37.8271
740	37.8252
750	37.8238
760	37.8227
770	37.8219
780	37.8214
790	37.8212
800	37.8212
810	37.8215
820	37.8219
830	37.8224
840	37.8231
850	38.7907
860	38.7694
870	38.7517
880	38.7371
890	38.725
900	38.7151
910	38.7071
920	38.7007
930	38.6956
940	38.6918
950	38.689
960	38.687
970	38.6859
980	38.6853
990	38.6854
1000	38.686
1010	38.6871
1020	38.6886
1030	38.6905
1040	38.6927
1050	38.6952
1060	38.6981
1070	38.7013
1080	38.7048
1090	38.7085
1100	39.7604
1110	39.7457
1120	39.7343
1130	39.7258
1140	39.7197
1150	39.7157
1160	39.7135
1170	39.713
1180	39.7138
1190	39.7158
1200	39.7189
1210	39.723
1220	39.728
1230	39.7338
1240	39.7404
1250	39.7477
1260	39.7556
1270	39.7643
1280	39.7736
1290	39.7836
1300	39.7942
1310	39.8054
1320	39.8173
1330	39.8299
1340	40.6053
1350	40.6142
1360	40.6255
1370	40.638
1380	40.6517
1390	40.6665
1400	40.6824
1410	40.6993
1420	40.7173
1430	40.7363
1440	40.7565
1450	40.7778
1460	40.8001
1470	40.8237
1480	40.8486
1490	40.8748
1500	40.9017
1510	40.9302
1520	40.9599
1530	40.9909
1540	41.0233
1550	41.057
1560	41.0924
1570	41.1293
1580	41.1679
1590	41.2083
1600	41.2045
1610	41.2856
1620	41.3624
1630	41.4361
1640	41.5079
1650	41.5785
1660	41.6488
1670	41.7196
1680	41.7906
1690	41.8625
1700	41.9355
1710	42.0101
1720	42.0868
1730	42.1658
1740	42.2475
1750	42.3322
1760	42.4201
1770	42.5114
1780	42.6067
1790	42.7053
1800	42.8074
1810	42.9131
1820	43.0227
1830	43.1367
1840	43.2551
1850	43.3852
1860	41.9247
1870	42.1658
1880	42.3941
1890	42.6134
1900	42.8269
1910	43.0385
1920	43.2501
1930	43.4633
1940	43.6794
1950	43.8965
1960	44.114
1970	44.3335
1980	44.5565
1990	44.7553
2000	44.8924
2010	45.0018
2020	45.1007
2030	45.1974
2040	45.2959
2050	45.3983
2060	45.5058
2070	45.639
2080	45.8784
2090	46.2513
2100	46.7563
2110	47.2509
2120	47.7165
2130	48.1609
2140	48.5907
2150	47.8614
2160	48.4025
2170	48.8938
2180	49.3821
2190	49.865
2200	50.2882
2210	50.7757
2220	51.2401
2230	51.699
2240	52.1543
2250	52.6092
2260	53.0662
2270	53.5251
2280	53.9874
2290	54.4535
2300	54.9245
2310	55.4005
2320	55.8821
2330	56.3685
2340	56.8599
2350	57.3567
2360	57.8595
2370	58.3674
2380	58.8806
2390	59.3974
2400	59.9171
2410	60.4327
2420	60.9456
2430	61.4563
2440	61.9677
2450	62.482
2460	63.0007
2470	63.5268
2480	64.0592
2490	64.5973
2500
2510
2520
2530
2540
2550
2560
2570
2580
2590
2600
2610
2620
2630

## Sheet: 除去水量的影响
	一下温度和含水率的变化是尼龙的数据
0.003	3185S	0.0001085M3/S		0.05	2405S		0.1	2089s		0.15	1850s		0.2	1619s		0.25	1409s		0.3	1209		0.35	1016s
0	19.9048	59.8555		19.9048	59.8555		19.9048	59.8555		19.9048	59.8555		19.9048	59.8555		19.9048	59.8555		19.9048	59.8555		19.9048	59.8555
10	21.5443	59.8282		21.5443	59.8282		21.5443	59.8282		21.5443	59.8282		21.5443	59.8282		21.5443	59.8282		21.5443	59.8282		21.5443	59.8282
20	23.0613	59.7845		23.0613	59.7845		23.0613	59.7845		23.0613	59.7845		23.0613	59.7845		23.0613	59.7845		23.0613	59.7845		23.0613	59.7845
30	24.469	59.7245		24.469	59.7245		24.469	59.7245		24.469	59.7245		24.469	59.7245		24.469	59.7245		24.469	59.7245		24.469	59.7245
40	25.77	59.6488		25.77	59.6488		25.77	59.6488		25.77	59.6488		25.77	59.6488		25.77	59.6488		25.77	59.6488		25.77	59.6488
50	26.9714	59.5573		26.9714	59.5573		26.9714	59.5573		26.9714	59.5573		26.9714	59.5573		26.9714	59.5573		26.9714	59.5573		26.9714	59.5573
60	28.0731	59.4503		28.0731	59.4503		28.0731	59.4503		28.0731	59.4503		28.0731	59.4503		28.0731	59.4503		28.0731	59.4503		28.0731	59.4503				计算燃气干衣机不同除水率（相同初始含水率）的除湿速率和SMER
70	29.0749	59.328		29.0749	59.328		29.0749	59.328		29.0749	59.328		29.0749	59.328		29.0749	59.328		29.0749	59.328		29.0749	59.328
80	29.9842	59.1918		29.9842	59.1918		29.9842	59.1918		29.9842	59.1918		29.9842	59.1918		29.9842	59.1918		29.9842	59.1918		29.9842	59.1918				类型	0.005	0.05	0.1	0.15	0.2	0.25	0.3	0.35
90	30.807	59.0423		30.807	59.0423		30.807	59.0423		30.807	59.0423		30.807	59.0423		30.807	59.0423		30.807	59.0423		30.807	59.0423				燃气V0Nm3/s	0.000103161	0.000103161	0.000103161	0.000103161	0.000103161	0.000103161	0.000103161	0.000103161
100	31.5491	58.8805		31.5491	58.8805		31.5491	58.8805		31.5491	58.8805		31.5491	58.8805		31.5491	58.8805		31.5491	58.8805		31.5491	58.8805				总用时time/s	3153	2315	2021	1795	1588	1390	1198	1016
110	32.2182	58.7073		32.2182	58.7073		32.2182	58.7073		32.2182	58.7073		32.2182	58.7073		32.2182	58.7073		32.2182	58.7073		32.2182	58.7073				总用气量Vz/Nm3	0.325266	0.238817	0.208488	0.185174	0.163819	0.143394	0.123587	0.104811
120	32.8167	58.5233		32.8167	58.5233		32.8167	58.5233		32.8167	58.5233		32.8167	58.5233		32.8167	58.5233		32.8167	58.5233		32.8167	58.5233				干燥能耗E/kwh	3.16592	2.32449	2.02928	1.80236	1.59451	1.3957	1.20291	1.02016
130	33.3521	58.3294		33.3521	58.3294		33.3521	58.3294		33.3521	58.3294		33.3521	58.3294		33.3521	58.3294		33.3521	58.3294		33.3521	58.3294				极干质量kg	3.525	3.525	3.525	3.525	3.525	3.525	3.525	3.525
140	33.8266	58.1262		33.8266	58.1262		33.8266	58.1262		33.8266	58.1262		33.8266	58.1262		33.8266	58.1262		33.8266	58.1262		33.8266	58.1262				初始质量kg	5.973	5.973	5.973	5.973	5.973	5.973	5.973	5.973
150	34.2472	57.9149		34.2472	57.9149		34.2472	57.9149		34.2472	57.9149		34.2472	57.9149		34.2472	57.9149		34.2472	57.9149		34.2472	57.9149				最终质量kg	3.75518	3.92333	4.11015	4.29697	4.4838	4.67063	4.85745	5.04427
160	34.6189	57.6963		34.6189	57.6963		34.6189	57.6963		34.6189	57.6963		34.6189	57.6963		34.6189	57.6963		34.6189	57.6963		34.6189	57.6963				除湿速率kg/h	2.53224	3.1874	3.31829	3.36139	3.37602	3.37306	3.35224	3.29076
170	34.9468	57.4711		34.9468	57.4711		34.9468	57.4711		34.9468	57.4711		34.9468	57.4711		34.9468	57.4711		34.9468	57.4711		34.9468	57.4711				SMERkwh/kg	1.4275	1.13408	1.08934	1.07538	1.07072	1.07166	1.07831	1.09846
180	35.2367	57.2401		35.2367	57.2401		35.2367	57.2401		35.2367	57.2401		35.2367	57.2401		35.2367	57.2401		35.2367	57.2401		35.2367	57.2401				能效	0.479686	0.603795	0.628589	0.636754	0.639526	0.638964	0.63502	0.623374
190	35.4928	57.0037		35.4928	57.0037		35.4928	57.0037		35.4928	57.0037		35.4928	57.0037		35.4928	57.0037		35.4928	57.0037		35.4928	57.0037
200	35.7161	56.7625		35.7161	56.7625		35.7161	56.7625		35.7161	56.7625		35.7161	56.7625		35.7161	56.7625		35.7161	56.7625		35.7161	56.7625
210	35.9109	56.517		35.9109	56.517		35.9109	56.517		35.9109	56.517		35.9109	56.517		35.9109	56.517		35.9109	56.517		35.9109	56.517
220	36.0806	56.2678		36.0806	56.2678		36.0806	56.2678		36.0806	56.2678		36.0806	56.2678		36.0806	56.2678		36.0806	56.2678		36.0806	56.2678
230	36.2287	56.0155		36.2287	56.0155		36.2287	56.0155		36.2287	56.0155		36.2287	56.0155		36.2287	56.0155		36.2287	56.0155		36.2287	56.0155
240	36.358	55.7603		36.358	55.7603		36.358	55.7603		36.358	55.7603		36.358	55.7603		36.358	55.7603		36.358	55.7603		36.358	55.7603
250	36.4707	55.5027		36.4707	55.5027		36.4707	55.5027		36.4707	55.5027		36.4707	55.5027		36.4707	55.5027		36.4707	55.5027		36.4707	55.5027
260	36.5686	55.2429		36.5686	55.2429		36.5686	55.2429		36.5686	55.2429		36.5686	55.2429		36.5686	55.2429		36.5686	55.2429		36.5686	55.2429
270	36.6537	54.9813		36.6537	54.9813		36.6537	54.9813		36.6537	54.9813		36.6537	54.9813		36.6537	54.9813		36.6537	54.9813		36.6537	54.9813
280	36.7277	54.718		36.7277	54.718		36.7277	54.718		36.7277	54.718		36.7277	54.718		36.7277	54.718		36.7277	54.718		36.7277	54.718
290	36.7921	54.4533		36.7921	54.4533		36.7921	54.4533		36.7921	54.4533		36.7921	54.4533		36.7921	54.4533		36.7921	54.4533		36.7921	54.4533
300	36.8481	54.1875		36.8481	54.1875		36.8481	54.1875		36.8481	54.1875		36.8481	54.1875		36.8481	54.1875		36.8481	54.1875		36.8481	54.1875
310	36.897	53.9206		36.897	53.9206		36.897	53.9206		36.897	53.9206		36.897	53.9206		36.897	53.9206		36.897	53.9206		36.897	53.9206
320	36.9395	53.6528		36.9395	53.6528		36.9395	53.6528		36.9395	53.6528		36.9395	53.6528		36.9395	53.6528		36.9395	53.6528		36.9395	53.6528
330	36.9767	53.3842		36.9767	53.3842		36.9767	53.3842		36.9767	53.3842		36.9767	53.3842		36.9767	53.3842		36.9767	53.3842		36.9767	53.3842
340	37.0092	53.115		37.0092	53.115		37.0092	53.115		37.0092	53.115		37.0092	53.115		37.0092	53.115		37.0092	53.115		37.0092	53.115
350	37.0377	52.8452		37.0377	52.8452		37.0377	52.8452		37.0377	52.8452		37.0377	52.8452		37.0377	52.8452		37.0377	52.8452		37.0377	52.8452
360	37.0627	52.575		37.0627	52.575		37.0627	52.575		37.0627	52.575		37.0627	52.575		37.0627	52.575		37.0627	52.575		37.0627	52.575
370	37.0847	52.3043		37.0847	52.3043		37.0847	52.3043		37.0847	52.3043		37.0847	52.3043		37.0847	52.3043		37.0847	52.3043		37.0847	52.3043
380	37.1042	52.0332		37.1042	52.0332		37.1042	52.0332		37.1042	52.0332		37.1042	52.0332		37.1042	52.0332		37.1042	52.0332		37.1042	52.0332
390	37.1214	51.7619		37.1214	51.7619		37.1214	51.7619		37.1214	51.7619		37.1214	51.7619		37.1214	51.7619		37.1214	51.7619		37.1214	51.7619
400	37.1367	51.4903		37.1367	51.4903		37.1367	51.4903		37.1367	51.4903		37.1367	51.4903		37.1367	51.4903		37.1367	51.4903		37.1367	51.4903
410	37.1504	51.2185		37.1504	51.2185		37.1504	51.2185		37.1504	51.2185		37.1504	51.2185		37.1504	51.2185		37.1504	51.2185		37.1504	51.2185
420	37.1627	50.9465		37.1627	50.9465		37.1627	50.9465		37.1627	50.9465		37.1627	50.9465		37.1627	50.9465		37.1627	50.9465		37.1627	50.9465
430	37.1738	50.6744		37.1738	50.6744		37.1738	50.6744		37.1738	50.6744		37.1738	50.6744		37.1738	50.6744		37.1738	50.6744		37.1738	50.6744
440	37.184	50.4021		37.184	50.4021		37.184	50.4021		37.184	50.4021		37.184	50.4021		37.184	50.4021		37.184	50.4021		37.184	50.4021
450	37.1932	50.1298		37.1932	50.1298		37.1932	50.1298		37.1932	50.1298		37.1932	50.1298		37.1932	50.1298		37.1932	50.1298		37.1932	50.1298
460	37.2018	49.8574		37.2018	49.8574		37.2018	49.8574		37.2018	49.8574		37.2018	49.8574		37.2018	49.8574		37.2018	49.8574		37.2018	49.8574
470	37.2097	49.5849		37.2097	49.5849		37.2097	49.5849		37.2097	49.5849		37.2097	49.5849		37.2097	49.5849		37.2097	49.5849		37.2097	49.5849
480	37.2172	49.3123		37.2172	49.3123		37.2172	49.3123		37.2172	49.3123		37.2172	49.3123		37.2172	49.3123		37.2172	49.3123		37.2172	49.3123
490	37.2242	49.0397		37.2242	49.0397		37.2242	49.0397		37.2242	49.0397		37.2242	49.0397		37.2242	49.0397		37.2242	49.0397		37.2242	49.0397
500	37.2309	48.7671		37.2309	48.7671		37.2309	48.7671		37.2309	48.7671		37.2309	48.7671		37.2309	48.7671		37.2309	48.7671		37.2309	48.7671
510	37.2373	48.4945		37.2373	48.4945		37.2373	48.4945		37.2373	48.4945		37.2373	48.4945		37.2373	48.4945		37.2373	48.4945		37.2373	48.4945
520	37.2435	48.2219		37.2435	48.2219		37.2435	48.2219		37.2435	48.2219		37.2435	48.2219		37.2435	48.2219		37.2435	48.2219		37.2435	48.2219
530	37.2496	47.9493		37.2496	47.9493		37.2496	47.9493		37.2496	47.9493		37.2496	47.9493		37.2496	47.9493		37.2496	47.9493		37.2496	47.9493
540	37.2555	47.6767		37.2555	47.6767		37.2555	47.6767		37.2555	47.6767		37.2555	47.6767		37.2555	47.6767		37.2555	47.6767		37.2555	47.6767
550	37.2614	47.4041		37.2614	47.4041		37.2614	47.4041		37.2614	47.4041		37.2614	47.4041		37.2614	47.4041		37.2614	47.4041		37.2614	47.4041
560	37.2672	47.1315		37.2672	47.1315		37.2672	47.1315		37.2672	47.1315		37.2672	47.1315		37.2672	47.1315		37.2672	47.1315		37.2672	47.1315
570	37.2731	46.859		37.2731	46.859		37.2731	46.859		37.2731	46.859		37.2731	46.859		37.2731	46.859		37.2731	46.859		37.2731	46.859
580	37.2789	46.5865		37.2789	46.5865		37.2789	46.5865		37.2789	46.5865		37.2789	46.5865		37.2789	46.5865		37.2789	46.5865		37.2789	46.5865
590	37.2848	46.314		37.2848	46.314		37.2848	46.314		37.2848	46.314		37.2848	46.314		37.2848	46.314		37.2848	46.314		37.2848	46.314
600	37.2907	46.0416		37.2907	46.0416		37.2907	46.0416		37.2907	46.0416		37.2907	46.0416		37.2907	46.0416		37.2907	46.0416		37.2907	46.0416
610	37.2967	45.7692		37.2967	45.7692		37.2967	45.7692		37.2967	45.7692		37.2967	45.7692		37.2967	45.7692		37.2967	45.7692		37.2967	45.7692
620	38.0831	45.4973		38.0831	45.4973		38.0831	45.4973		38.0831	45.4973		38.0831	45.4973		38.0831	45.4973		38.0831	45.4973		38.0831	45.4973
630	38.0731	45.226		38.0731	45.226		38.0731	45.226		38.0731	45.226		38.0731	45.226		38.0731	45.226		38.0731	45.226		38.0731	45.226
640	38.0654	44.955		38.0654	44.955		38.0654	44.955		38.0654	44.955		38.0654	44.955		38.0654	44.955		38.0654	44.955		38.0654	44.955
650	38.06	44.6843		38.06	44.6843		38.06	44.6843		38.06	44.6843		38.06	44.6843		38.06	44.6843		38.06	44.6843		38.06	44.6843
660	38.0564	44.4138		38.0564	44.4138		38.0564	44.4138		38.0564	44.4138		38.0564	44.4138		38.0564	44.4138		38.0564	44.4138		38.0564	44.4138
670	38.0544	44.1437		38.0544	44.1437		38.0544	44.1437		38.0544	44.1437		38.0544	44.1437		38.0544	44.1437		38.0544	44.1437		38.0544	44.1437
680	38.0538	43.8737		38.0538	43.8737		38.0538	43.8737		38.0538	43.8737		38.0538	43.8737		38.0538	43.8737		38.0538	43.8737		38.0538	43.8737
690	38.0545	43.604		38.0545	43.604		38.0545	43.604		38.0545	43.604		38.0545	43.604		38.0545	43.604		38.0545	43.604		38.0545	43.604
700	38.0563	43.3344		38.0563	43.3344		38.0563	43.3344		38.0563	43.3344		38.0563	43.3344		38.0563	43.3344		38.0563	43.3344		38.0563	43.3344
710	38.0591	43.065		38.0591	43.065		38.0591	43.065		38.0591	43.065		38.0591	43.065		38.0591	43.065		38.0591	43.065		38.0591	43.065
720	38.0628	42.7958		38.0628	42.7958		38.0628	42.7958		38.0628	42.7958		38.0628	42.7958		38.0628	42.7958		38.0628	42.7958		38.0628	42.7958
730	38.0673	42.5267		38.0673	42.5267		38.0673	42.5267		38.0673	42.5267		38.0673	42.5267		38.0673	42.5267		38.0673	42.5267		38.0673	42.5267
740	38.0725	42.2578		38.0725	42.2578		38.0725	42.2578		38.0725	42.2578		38.0725	42.2578		38.0725	42.2578		38.0725	42.2578		38.0725	42.2578
750	38.0783	41.989		38.0783	41.989		38.0783	41.989		38.0783	41.989		38.0783	41.989		38.0783	41.989		38.0783	41.989		38.0783	41.989
760	38.0848	41.7203		38.0848	41.7203		38.0848	41.7203		38.0848	41.7203		38.0848	41.7203		38.0848	41.7203		38.0848	41.7203		38.0848	41.7203
770	38.0918	41.4517		38.0918	41.4517		38.0918	41.4517		38.0918	41.4517		38.0918	41.4517		38.0918	41.4517		38.0918	41.4517		38.0918	41.4517
780	38.0993	41.1833		38.0993	41.1833		38.0993	41.1833		38.0993	41.1833		38.0993	41.1833		38.0993	41.1833		38.0993	41.1833		38.0993	41.1833
790	38.1073	40.9149		38.1073	40.9149		38.1073	40.9149		38.1073	40.9149		38.1073	40.9149		38.1073	40.9149		38.1073	40.9149		38.1073	40.9149
800	38.1158	40.6467		38.1158	40.6467		38.1158	40.6467		38.1158	40.6467		38.1158	40.6467		38.1158	40.6467		38.1158	40.6467		38.1158	40.6467
810	38.1247	40.3786		38.1247	40.3786		38.1247	40.3786		38.1247	40.3786		38.1247	40.3786		38.1247	40.3786		38.1247	40.3786		38.1247	40.3786
820	38.1341	40.1106		38.1341	40.1106		38.1341	40.1106		38.1341	40.1106		38.1341	40.1106		38.1341	40.1106		38.1341	40.1106		38.1341	40.1106
830	38.1439	39.8427		38.1439	39.8427		38.1439	39.8427		38.1439	39.8427		38.1439	39.8427		38.1439	39.8427		38.1439	39.8427		38.1439	39.8427
840	38.1541	39.575		38.1541	39.575		38.1541	39.575		38.1541	39.575		38.1541	39.575		38.1541	39.575		38.1541	39.575		38.1541	39.575
850	38.1648	39.3073		38.1648	39.3073		38.1648	39.3073		38.1648	39.3073		38.1648	39.3073		38.1648	39.3073		38.1648	39.3073		38.1648	39.3073
860	39.1205	39.0404		39.1205	39.0404		39.1205	39.0404		39.1205	39.0404		39.1205	39.0404		39.1205	39.0404		39.1205	39.0404		39.1205	39.0404
870	39.1118	38.7743		39.1118	38.7743		39.1118	38.7743		39.1118	38.7743		39.1118	38.7743		39.1118	38.7743		39.1118	38.7743		39.1118	38.7743
880	39.1065	38.5087		39.1065	38.5087		39.1065	38.5087		39.1065	38.5087		39.1065	38.5087		39.1065	38.5087		39.1065	38.5087		39.1065	38.5087
890	39.1041	38.2435		39.1041	38.2435		39.1041	38.2435		39.1041	38.2435		39.1041	38.2435		39.1041	38.2435		39.1041	38.2435		39.1041	38.2435
900	39.1044	37.9787		39.1044	37.9787		39.1044	37.9787		39.1044	37.9787		39.1044	37.9787		39.1044	37.9787		39.1044	37.9787		39.1044	37.9787
910	39.1069	37.7142		39.1069	37.7142		39.1069	37.7142		39.1069	37.7142		39.1069	37.7142		39.1069	37.7142		39.1069	37.7142		39.1069	37.7142
920	39.1113	37.4501		39.1113	37.4501		39.1113	37.4501		39.1113	37.4501		39.1113	37.4501		39.1113	37.4501		39.1113	37.4501		39.1113	37.4501
930	39.1175	37.1862		39.1175	37.1862		39.1175	37.1862		39.1175	37.1862		39.1175	37.1862		39.1175	37.1862		39.1175	37.1862		39.1175	37.1862
940	39.1252	36.9226		39.1252	36.9226		39.1252	36.9226		39.1252	36.9226		39.1252	36.9226		39.1252	36.9226		39.1252	36.9226		39.1252	36.9226
950	39.1342	36.6592		39.1342	36.6592		39.1342	36.6592		39.1342	36.6592		39.1342	36.6592		39.1342	36.6592		39.1342	36.6592		39.1342	36.6592
960	39.1445	36.396		39.1445	36.396		39.1445	36.396		39.1445	36.396		39.1445	36.396		39.1445	36.396		39.1445	36.396		39.1445	36.396
970	39.1558	36.1331		39.1558	36.1331		39.1558	36.1331		39.1558	36.1331		39.1558	36.1331		39.1558	36.1331		39.1558	36.1331		39.1558	36.1331
980	39.1681	35.8704		39.1681	35.8704		39.1681	35.8704		39.1681	35.8704		39.1681	35.8704		39.1681	35.8704		39.1681	35.8704		39.1681	35.8704
990	39.1814	35.6078		39.1814	35.6078		39.1814	35.6078		39.1814	35.6078		39.1814	35.6078		39.1814	35.6078		39.1814	35.6078		39.1814	35.6078
1000	39.1955	35.3455		39.1955	35.3455		39.1955	35.3455		39.1955	35.3455		39.1955	35.3455		39.1955	35.3455		39.1955	35.3455		39.1955	35.3455
1010	39.2104	35.0834		39.2104	35.0834		39.2104	35.0834		39.2104	35.0834		39.2104	35.0834		39.2104	35.0834		39.2104	35.0834		39.2104	35.0834
1020	39.2262	34.8214		39.2262	34.8214		39.2262	34.8214		39.2262	34.8214		39.2262	34.8214		39.2262	34.8214		39.2262	34.8214			34.9786
1030	39.2426	34.5597		39.2426	34.5597		39.2426	34.5597		39.2426	34.5597		39.2426	34.5597		39.2426	34.5597		39.2426	34.5597
1040	39.2598	34.2981		39.2598	34.2981		39.2598	34.2981		39.2598	34.2981		39.2598	34.2981		39.2598	34.2981		39.2598	34.2981
1050	39.2778	34.0367		39.2778	34.0367		39.2778	34.0367		39.2778	34.0367		39.2778	34.0367		39.2778	34.0367		39.2778	34.0367
1060	39.2964	33.7755		39.2964	33.7755		39.2964	33.7755		39.2964	33.7755		39.2964	33.7755		39.2964	33.7755		39.2964	33.7755
1070	39.3157	33.5146		39.3157	33.5146		39.3157	33.5146		39.3157	33.5146		39.3157	33.5146		39.3157	33.5146		39.3157	33.5146
1080	39.3357	33.2538		39.3357	33.2538		39.3357	33.2538		39.3357	33.2538		39.3357	33.2538		39.3357	33.2538		39.3357	33.2538
1090	39.3564	32.9932		39.3564	32.9932		39.3564	32.9932		39.3564	32.9932		39.3564	32.9932		39.3564	32.9932		39.3564	32.9932
1100	39.3778	32.7328		39.3778	32.7328		39.3778	32.7328		39.3778	32.7328		39.3778	32.7328		39.3778	32.7328		39.3778	32.7328
1110	40.4294	32.4742		40.4294	32.4742		40.4294	32.4742		40.4294	32.4742		40.4294	32.4742		40.4294	32.4742		40.4294	32.4742
1120	40.4336	32.2164		40.4336	32.2164		40.4336	32.2164		40.4336	32.2164		40.4336	32.2164		40.4336	32.2164		40.4336	32.2164
1130	40.4415	31.9591		40.4415	31.9591		40.4415	31.9591		40.4415	31.9591		40.4415	31.9591		40.4415	31.9591		40.4415	31.9591
1140	40.4525	31.7023		40.4525	31.7023		40.4525	31.7023		40.4525	31.7023		40.4525	31.7023		40.4525	31.7023		40.4525	31.7023
1150	40.4663	31.446		40.4663	31.446		40.4663	31.446		40.4663	31.446		40.4663	31.446		40.4663	31.446		40.4663	31.446
1160	40.4825	31.1901		40.4825	31.1901		40.4825	31.1901		40.4825	31.1901		40.4825	31.1901		40.4825	31.1901		40.4825	31.1901
1170	40.5009	30.9345		40.5009	30.9345		40.5009	30.9345		40.5009	30.9345		40.5009	30.9345		40.5009	30.9345		40.5009	30.9345
1180	40.5213	30.6794		40.5213	30.6794		40.5213	30.6794		40.5213	30.6794		40.5213	30.6794		40.5213	30.6794		40.5213	30.6794
1190	40.5434	30.4245		40.5434	30.4245		40.5434	30.4245		40.5434	30.4245		40.5434	30.4245		40.5434	30.4245		40.5434	30.4245
1200	40.5672	30.1701		40.5672	30.1701		40.5672	30.1701		40.5672	30.1701		40.5672	30.1701		40.5672	30.1701		40.5672	30.1701
1210	40.5978	29.9157		40.5978	29.9157		40.5978	29.9157		40.5978	29.9157		40.5978	29.9157		40.5978	29.9157			29.9919
1220	40.6234	29.6618		40.6234	29.6618		40.6234	29.6618		40.6234	29.6618		40.6234	29.6618		40.6234	29.6618
1230	40.6505	29.4083		40.6505	29.4083		40.6505	29.4083		40.6505	29.4083		40.6505	29.4083		40.6505	29.4083
1240	40.6787	29.1551		40.6787	29.1551		40.6787	29.1551		40.6787	29.1551		40.6787	29.1551		40.6787	29.1551
1250	40.7083	28.9023		40.7083	28.9023		40.7083	28.9023		40.7083	28.9023		40.7083	28.9023		40.7083	28.9023
1260	40.7393	28.6498		40.7393	28.6498		40.7393	28.6498		40.7393	28.6498		40.7393	28.6498		40.7393	28.6498
1270	40.7715	28.3976		40.7715	28.3976		40.7715	28.3976		40.7715	28.3976		40.7715	28.3976		40.7715	28.3976
1280	40.805	28.1457		40.805	28.1457		40.805	28.1457		40.805	28.1457		40.805	28.1457		40.805	28.1457
1290	40.8397	27.8942		40.8397	27.8942		40.8397	27.8942		40.8397	27.8942		40.8397	27.8942		40.8397	27.8942
1300	40.8757	27.6431		40.8757	27.6431		40.8757	27.6431		40.8757	27.6431		40.8757	27.6431		40.8757	27.6431
1310	40.9129	27.3923		40.9129	27.3923		40.9129	27.3923		40.9129	27.3923		40.9129	27.3923		40.9129	27.3923
1320	40.9513	27.1418		40.9513	27.1418		40.9513	27.1418		40.9513	27.1418		40.9513	27.1418		40.9513	27.1418
1330	40.9911	26.8918		40.9911	26.8918		40.9911	26.8918		40.9911	26.8918		40.9911	26.8918		40.9911	26.8918
1340	41.0325	26.642		41.0325	26.642		41.0325	26.642		41.0325	26.642		41.0325	26.642		41.0325	26.642
1350	41.0748	26.3926		41.0748	26.3926		41.0748	26.3926		41.0748	26.3926		41.0748	26.3926		41.0748	26.3926
1360	41.8548	26.1444		41.8548	26.1444		41.8548	26.1444		41.8548	26.1444		41.8548	26.1444		41.8548	26.1444
1370	41.8953	25.8986		41.8953	25.8986		41.8953	25.8986		41.8953	25.8986		41.8953	25.8986		41.8953	25.8986
1380	41.9373	25.6532		41.9373	25.6532		41.9373	25.6532		41.9373	25.6532		41.9373	25.6532		41.9373	25.6532
1390	41.9809	25.4082		41.9809	25.4082		41.9809	25.4082		41.9809	25.4082		41.9809	25.4082		41.9809	25.4082
1400	42.0259	25.1637		42.0259	25.1637		42.0259	25.1637		42.0259	25.1637		42.0259	25.1637		42.0259	25.1637
1410	42.0725	24.9195		42.0725	24.9195		42.0725	24.9195		42.0725	24.9195		42.0725	24.9195			24.9927
1420	42.1205	24.6759		42.1205	24.6759		42.1205	24.6759		42.1205	24.6759		42.1205	24.6759
1430	41.2919	24.4326		41.2919	24.4326		41.2919	24.4326		41.2919	24.4326		41.2919	24.4326
1440	42.222	24.1895		42.222	24.1895		42.222	24.1895		42.222	24.1895		42.222	24.1895
1450	42.2745	23.9472		42.2745	23.9472		42.2745	23.9472		42.2745	23.9472		42.2745	23.9472
1460	42.3286	23.7054		42.3286	23.7054		42.3286	23.7054		42.3286	23.7054		42.3286	23.7054
1470	42.3844	23.464		42.3844	23.464		42.3844	23.464		42.3844	23.464		42.3844	23.464
1480	42.4418	23.2232		42.4418	23.2232		42.4418	23.2232		42.4418	23.2232		42.4418	23.2232
1490	42.5009	22.9828		42.5009	22.9828		42.5009	22.9828		42.5009	22.9828		42.5009	22.9828
1500	42.5617	22.743		42.5617	22.743		42.5617	22.743		42.5617	22.743		42.5617	22.743
1510	42.6248	22.5037		42.6248	22.5037		42.6248	22.5037		42.6248	22.5037		42.6248	22.5037
1520	42.6895	22.2649		42.6895	22.2649		42.6895	22.2649		42.6895	22.2649		42.6895	22.2649
1530	42.7555	22.0266		42.7555	22.0266		42.7555	22.0266		42.7555	22.0266		42.7555	22.0266
1540	42.823	21.7889		42.823	21.7889		42.823	21.7889		42.823	21.7889		42.823	21.7889
1550	42.8919	21.5516		42.8919	21.5516		42.8919	21.5516		42.8919	21.5516		42.8919	21.5516
1560	42.9626	21.315		42.9626	21.315		42.9626	21.315		42.9626	21.315		42.9626	21.315
1570	43.0349	21.0789		43.0349	21.0789		43.0349	21.0789		43.0349	21.0789		43.0349	21.0789
1580	43.1091	20.8434		43.1091	20.8434		43.1091	20.8434		43.1091	20.8434		43.1091	20.8434
1590	43.1853	20.6086		43.1853	20.6086		43.1853	20.6086		43.1853	20.6086		43.1853	20.6086
1600	43.2634	20.3744		43.2634	20.3744		43.2634	20.3744		43.2634	20.3744		43.2634	20.3744
1610	43.3436	20.1408		43.3436	20.1408		43.3436	20.1408		43.3436	20.1408		43.3436	20.1408
1620	43.426	19.9079		43.426	19.9079		43.426	19.9079		43.426	19.9079			19.9777
1630	43.5056	19.6786		43.5056	19.6786		43.5056	19.6786		43.5056	19.6786
1640	43.6272	19.4512		43.6272	19.4512		43.6272	19.4512		43.6272	19.4512
1650	43.7446	19.2239		43.7446	19.2239		43.7446	19.2239		43.7446	19.2239
1660	43.8591	18.9967		43.8591	18.9967		43.8591	18.9967		43.8591	18.9967
1670	43.9718	18.7699		43.9718	18.7699		43.9718	18.7699		43.9718	18.7699
1680	44.0834	18.5434		44.0834	18.5434		44.0834	18.5434		44.0834	18.5434
1690	44.1947	18.3174		44.1947	18.3174		44.1947	18.3174		44.1947	18.3174
1700	44.3064	18.0921		44.3064	18.0921		44.3064	18.0921		44.3064	18.0921
1710	44.4183	17.8673		44.4183	17.8673		44.4183	17.8673		44.4183	17.8673
1720	44.532	17.6434		44.532	17.6434		44.532	17.6434		44.532	17.6434
1730	44.6482	17.4203		44.6482	17.4203		44.6482	17.4203		44.6482	17.4203
1740	44.7669	17.1981		44.7669	17.1981		44.7669	17.1981		44.7669	17.1981
1750	44.8883	16.9768		44.8883	16.9768		44.8883	16.9768		44.8883	16.9768
1760	45.0126	16.7565		45.0126	16.7565		45.0126	16.7565		45.0126	16.7565
1770	45.1399	16.5371		45.1399	16.5371		45.1399	16.5371		45.1399	16.5371
1780	45.271	16.3187		45.271	16.3187		45.271	16.3187		45.271	16.3187
1790	45.4056	16.1011		45.4056	16.1011		45.4056	16.1011		45.4056	16.1011
1800	45.5401	15.884		45.5401	15.884		45.5401	15.884		45.5401	15.884
1810	45.6754	15.6677		45.6754	15.6677		45.6754	15.6677		45.6754	15.6677
1820	45.8119	15.4522		45.8119	15.4522		45.8119	15.4522		45.8119	15.4522
1830	45.9501	15.2376		45.9501	15.2376		45.9501	15.2376		45.9501	15.2376
1840	46.0904	15.0239		46.0904	15.0239		46.0904	15.0239		46.0904	15.0239
1850	46.2609	14.8098		46.2609	14.8098		46.2609	14.8098			14.9813
1860	46.3871	14.5902		46.3871	14.5902		46.3871	14.5902
1870	46.4719	14.3677		46.4719	14.3677		46.4719	14.3677
1880	46.5382	14.1441		46.5382	14.1441		46.5382	14.1441
1890	46.5965	13.9202		46.5965	13.9202		46.5965	13.9202
1900	46.652	13.6964		46.652	13.6964		46.652	13.6964
1910	45.1336	13.476		45.1336	13.476		45.1336	13.476
1920	45.2634	13.2558		45.2634	13.2558		45.2634	13.2558
1930	45.3631	13.0318		45.3631	13.0318		45.3631	13.0318
1940	45.4485	12.8063		45.4485	12.8063		45.4485	12.8063
1950	45.5277	12.5803		45.5277	12.5803		45.5277	12.5803
1960	45.6202	12.3565		45.6202	12.3565		45.6202	12.3565
1970	45.7798	12.1422		45.7798	12.1422		45.7798	12.1422
1980	46.0248	11.9403		46.0248	11.9403		46.0248	11.9403
1990	46.372	11.7535		46.372	11.7535		46.372	11.7535
2000	46.8013	11.5794		46.8013	11.5794		46.8013	11.5794
2010	47.1992	11.4028		47.1992	11.4028		47.1992	11.4028
2020	47.5651	11.2234		47.5651	11.2234		47.5651	11.2234
2030	47.9058	11.0422		47.9058	11.0422		47.9058	11.0422
2040	48.2271	10.8598		48.2271	10.8598		48.2271	10.8598
2050	48.5335	10.6767		48.5335	10.6767		48.5335	10.6767
2060	48.8272	10.4931		48.8272	10.4931		48.8272	10.4931
2070	49.1117	10.3095		49.1117	10.3095		49.1117	10.3095
2080	49.3898	10.1263		49.3898	10.1263		49.3898	10.1263
2090	49.6629	9.94354		49.6629	9.94354			9.9983
2100	49.9328	9.76147		49.9328	9.76147
2110	50.2013	9.58034		50.2013	9.58034
2120	50.4693	9.40026		50.4693	9.40026
2130	50.7364	9.22119		50.7364	9.22119
2140	51.0042	9.04331		51.0042	9.04331
2150	51.2737	8.86678		51.2737	8.86678
2160	51.5455	8.69166		51.5455	8.69166
2170	51.8201	8.51804		51.8201	8.51804
2180	52.0983	8.34605		52.0983	8.34605
2190	52.3796	8.17562		52.3796	8.17562
2200	52.6622	8.00654		52.6622	8.00654
2210	52.9473	7.83895		52.9473	7.83895
2220	53.2356	7.67298		53.2356	7.67298
2230	52.4253	7.51364		52.4253	7.51364
2240	52.8509	7.36169		52.8509	7.36169
2250	53.2581	7.20921		53.2581	7.20921
2260	53.6502	7.05654		53.6502	7.05654
2270	54.0314	6.90416		54.0314	6.90416
2280	54.404	6.7523		54.404	6.7523
2290	54.7708	6.6013		54.7708	6.6013
2300	55.1339	6.45136		55.1339	6.45136
2310	55.4942	6.30263		55.4942	6.30263
2320	55.8539	6.15533		55.8539	6.15533
2330	56.2128	6.00945		56.2128	6.00945
2340	56.5718	5.86511		56.5718	5.86511
2350	56.9323	5.72247		56.9323	5.72247
2360	57.2946	5.58158		57.2946	5.58158
2370	57.6695	5.44145		57.6695	5.44145
2380	58.0395	5.30462		58.0395	5.30462
2390	58.4117	5.16963		58.4117	5.16963
2400	58.7872	5.03663		58.7872	5.03663
2410	59.1651	4.9055			4.9971
2420	59.5455	4.77631
2430	59.9275	4.64891
2440	60.3058	4.5227
2450	60.6827	4.39794
2460	61.0586	4.27465
2470	61.4346	4.15299
2480	61.8126	4.03316
2490	62.194	3.91537
2500	62.58	3.79976
2510	62.9714	3.68644
2520	63.3687	3.5755
2530	63.7724	3.46704
2540	64.1828	3.3611
2550	64.6	3.25775
2560	65.0138	3.15546
2570	65.4476	3.05765
2580	65.8806	2.96162
2590	66.3073	2.8667
2600	66.7311	2.77329
2610	67.1547	2.68168
2620	67.5798	2.59208
2630	68.0079	2.50467
2640	68.4399	2.41958
2650	68.8766	2.33691
2660	69.3183	2.25673
2670	69.7654	2.17908
2680	70.2178	2.10401
2690	70.6689	2.03076
2700	70.7568	1.96784
2710	71.286	1.90517
2720	71.7935	1.84232
2730	72.2854	1.77989
2740	72.766	1.71833
2750	73.239	1.658
2760	73.7069	1.59915
2770	74.1717	1.54199
2780	74.6346	1.48666
2790	75.0905	1.43257
2800	75.5319	1.37882
2810	75.9637	1.32591
2820	76.3896	1.27423
2830	76.8122	1.22404
2840	77.2335	1.17557
2850	77.6547	1.12893
2860	78.0766	1.08423
2870	78.4996	1.04152
2880	78.9239	1.00081
2890	79.3494	0.962118
2900	79.7739	0.925201
2910	80.1835	0.888474
2920	80.5807	0.852144
2930	80.97	0.816681
2940	81.3559	0.781853
2950	81.7392	0.749136
2960	82.1207	0.717921
2970	82.5013	0.688292
2980	82.8814	0.660288
2990	83.261	0.633913
3000	83.6398	0.609142
3010	84.0149	0.585553
3020	84.3887	0.563628
3030	84.7577	0.542766
3040	85.104	0.520986
3050	85.4354	0.499074
3060	85.7577	0.477615
3070	86.0746	0.456975
3080	86.3882	0.437367
3090	86.6995	0.418902
3100	87.009	0.401624
3110	87.3168	0.385531
3120	87.6227	0.370592
3130	87.9262	0.356756
3140	88.227	0.343963
3150	88.5223	0.331938
3160	88.8168	0.321106
3170	89.1068	0.311083
3180	89.392	0.301815
		0.299326

## Sheet: 温度等的影响
		Dry Mass of Clothes	Proportion	Dry Mass of Clothes	Initial Mass/	Area	Time	Calculation-Moisture Extraction Rate(MER) and Specific Moisture Extraction Rate(SMER) of Gas Clothes Dryer under Different Mass
	Mass	3.525	0.6	2.115	3.58704	1.9035	1617
		3.525	0.8	2.82	4.78272	2.256	2045	Type	2.115	2.82	3.525	4.23	4.935
		3.525	1	3.525	5.9784	2.4675	2494	Gas Flow Rate/Nm3/s	0.000103161	0.000103161	0.000103161	0.000103161	0.000103161
		3.525	1.2	4.23	7.17408	2.538	2970	Total Time/s	1617	2045	2494	2970	3449
		3.525	1.4	4.935	8.36976	2.5662	3449	Total Time/min	26.95	34.0833	41.5667	49.5	57.4833
								Total Gas ConsumptionVz/Nm3	0.166811	0.210964	0.257283	0.306388	0.355802
								Drying Energy Consumption/kwh	1.62363	2.05338	2.50422	2.98217	3.46314
								Extreme dry mass/kg	2.115	2.82	3.525	4.23	4.935
								Initial Mass/kg	3.58704	4.78272	5.973	7.17408	8.36976
		Relative Humidity	Proportion	Relative Humidity	Water Content	Drying Time		Final Mass/kg	2.30916	3.07888	3.84859	4.61831	5.38803
	Relative Humidity	60	0.6	36	5.211	2407		MER/kg/h	2.84501	2.99943	3.0665	3.0979	3.11227
		60	0.8	48	6.968	2452		SMER/(kw·h/kg)	1.27056	1.20515	1.17879	1.16684	1.16145
		60	1	60	8.734	2494		Energy Efficiency%	0.538935	0.568188	0.580893	0.586841	0.589563
		60	1.2	72	10.51	2538
		60	1.4	84	12.297	2581
		Temperature	Proportion	Temperature	Water Content	Drying Time		Calculation-Moisture Extraction Rate(MER) and Specific Moisture Extraction Rate(SMER) of Gas Clothes Dryer under Different Relative Humidity
	Temperature	20	0.6	12	5.209	2681
		20	0.8	16	6.77	2581		Type	36	48	60	72	84
		20	1	20	8.734	2494		Gas Flow Rate/Nm3/s	0.000103161	0.000103161	0.000103161	0.000103161	0.000103161
		20	1.2	24	11.191	2419		Total Time/s	2407	2452	2494	2538	2581
		20	1.4	28	14.247	2356		Total Time/min	40.1167	40.8667	41.5667	42.3	43.0167
								Total Gas ConsumptionVz/Nm3	0.248308	0.25295	0.257283	0.261822	0.266258
								Drying Energy Consumption/kwh	2.41687	2.46205	2.50422	2.5484	2.59158
								Extreme dry mass/kg	3.525	3.525	3.525	3.525	3.525
	Sensitivity Analysis							Initial Mass/kg	5.973	5.973	5.973	5.973	5.973
								Final Mass/kg	3.84859	3.84859	3.84859	3.84859	3.84859
	Mass							MER/kg/h	3.17734	3.11903	3.0665	3.01334	2.96314
	Type	2.115	2.82	3.525	4.23	4.935		SMER/(kw·h/kg)	1.13767	1.15894	1.17879	1.19958	1.21991
		26.95	34.0833	41.5667	49.5	57.4833		Energy Efficiency%	0.601889	0.590843	0.580893	0.570823	0.561313
	SMER/(kw·h/kg)	1.27056	1.20515	1.17879	1.16684	1.16145
	Humidity
	Type	36	48	60	72	84		Calculation-Moisture Extraction Rate(MER) and Specific Moisture Extraction Rate(SMER) of Gas Clothes Dryer under Different Temperature
		40.1167	40.8667	41.5667	42.3	43.0167
	SMER/(kw·h/kg)	1.13767	1.15894	1.17879	1.19958	1.21991		Type	12	16	20	24	28
								Gas Flow Rate/Nm3/s	0.000103161	0.000103161	0.000103161	0.000103161	0.000103161
	Temperature							Total Time/s	2681	2581	2494	2419	2356
	Type	12	16	20	24	28		Total Time/min	44.6833	43.0167	41.5667	40.3167	39.2667
		44.6833	43.0167	41.5667	40.3167	39.2667		Total Gas ConsumptionVz/Nm3	0.276574	0.266258	0.257283	0.249546	0.243047
	SMER/(kw·h/kg)	1.26717	1.21991	1.17879	1.14334	1.11356		Drying Energy Consumption/kwh	2.69199	2.59158	2.50422	2.42892	2.36566
								Extreme dry mass/kg	3.525	3.525	3.525	3.525	3.525
	Gas Flow							Initial Mass/kg	5.973	5.973	5.973	5.973	5.973
	Type	6.09112e-05	8.47204e-05	0.00010853	0.000132339	0.000156148		Final Mass/kg	3.84859	3.84859	3.84859	3.84859	3.84859
		78.7	54.4167	41.5667	33.0833	27.8333		MER/kg/h	2.85261	2.96314	3.0665	3.16158	3.24612
	SMER/(kw·h/kg)	1.25295	1.20498	1.17911	1.14435	1.13596		SMER/(kw·h/kg)	1.26717	1.21991	1.17879	1.14334	1.11356
								Energy Efficiency%	0.540376	0.561313	0.580893	0.598904	0.614918
	Air velocity
	Type	6	8	10	12	14
		38.1333	39.7167	41.5667	43.8833	46.3167		Calculation-Moisture Extraction Rate(MER) and Specific Moisture Extraction Rate(MER) of Gas Clothes Dryer under Different Gas Flow Rate
	SMER/(kw·h/kg)	1.08142	1.12632	1.17879	1.24449	1.31349
								Type	6.09112e-05	8.47204e-05	0.00010853	0.000132339	0.000156148
								Gas Flow Rate/Nm3/s	5.79138e-05	8.05514e-05	0.000103189	0.000125827	0.000148464
								Total Time/s	4722	3265	2494	1985	1670
								Total Time/min	78.7	54.4167	41.5667	33.0833	27.8333
								Total Gas ConsumptionVz/Nm3	0.273469	0.263	0.257353	0.249766	0.247935
								Drying Energy Consumption/kwh	2.66177	2.55987	2.50491	2.43105	2.41324
								Extreme dry mass/kg	3.525	3.525	3.525	3.525	3.525
								Initial Mass/kg	5.973	5.973	5.973	5.973	5.973
								Final Mass/kg	3.84859	3.84859	3.84859	3.84859	3.84859
								MER/kg/h	1.61962	2.34238	3.0665	3.85283	4.57956
								SMER/(kw·h/kg)	1.25295	1.20498	1.17911	1.14435	1.13596
								Energy Efficiency%	0.546512	0.568266	0.580735	0.598377	0.602795
								Calculation-Moisture Extraction Rate(MER) and Specific Moisture Extraction Rate(MER) of Gas Clothes Dryer under Different Air Velocity
								Type	6	8	10	12	14
								Gas Flow Rate/Nm3/s	0.000103161	0.000103161	0.000103161	0.000103161	0.000103161
								Total Time/s	2288	2383	2494	2633	2779
								Total Time/min	38.1333	39.7167	41.5667	43.8833	46.3167
								Total Gas ConsumptionVz/Nm3	0.236032	0.245832	0.257283	0.271623	0.286684
								Drying Energy Consumption/kwh	2.29738	2.39277	2.50422	2.64379	2.79039
								Extreme dry mass/kg	3.525	3.525	3.525	3.525	3.525
								Initial Mass/kg	5.973	5.973	5.973	5.973	5.973
								Final Mass/kg	3.84859	3.84859	3.84859	3.84859	3.84859
								MER/kg/h	3.3426	3.20934	3.0665	2.90462	2.75202
								SMER/(kw·h/kg)	1.08142	1.12632	1.17879	1.24449	1.31349
								Energy Efficiency%	0.633194	0.607951	0.580893	0.550227	0.52132

## Sheet: 不同衣物质量
不同质量	1.489	2.486	3.525	4.53	6.011
干燥时间	1311	1856	2494	3144	4139
初始质量kg	2.52534	4.21626	5.9784	7.68288	10.1947
面积	1.35	2	2.45	2.7	2.76
最终质量kg	1.62569	2.71421	3.8486	4.94585	6.56281
计算燃气干衣机不同衣物质量的除湿速率和SMER
							衣物质量
类型	1.489	2.486	3.525	4.53	6.011		类型	1.489	2.486	3.525	4.53	6.011
燃气V0Nm3/s	0.000103161	0.000103161	0.000103161	0.000103161	0.000103161		总用时/min	21.85	30.9333	41.5667	52.4	68.9833
总用时time/s	1311	1856	2494	3144	4139		SMERkwh/kg	1.4632	1.24072	1.17879	1.1534	1.14431
总用时/min	21.85	30.9333	41.5667	52.4	68.9833
总用气量Vz/Nm3	0.135244	0.191467	0.257283	0.324338	0.426983
干燥能耗E/kwh	1.31637	1.86361	2.50422	3.15689	4.15597
极干质量kg	3.525	3.525	3.525	3.525	3.525
初始质量kg	2.52534	4.21626	5.973	7.68288	10.1947
最终质量kg	1.62569	2.71421	3.8486	4.94585	6.56281
除湿速率kg/h	2.47045	2.91344	3.0665	3.134	3.15889
SMERkwh/kg	1.4632	1.24072	1.17879	1.1534	1.14431
能效%	0.467981	0.551899	0.580893	0.593679	0.598394
